# Supplementary material
Source: PubMed Central journal article supplement (PMC8171002)
Supplement: NIHMS1701468-supplement-Supplementary_Material.pdf [file NIHMS1701468-supplement-Supplementary_Material.pdf]

## Supplementary Material\*

McGinty EE, Stone EM, Kennedy-Hendricks A, et al. Medication for opioid use disorder: a national survey of primary care physicians. *Ann Intern Med.* 21 April 2020. doi:10.7326/M19-3975

Survey Mailed to U.S. Physicians Selected From the American Medical Association Physician Masterfile

\* This supplementary material was provided by the authors to give readers further details on their article. The material was reviewed but not copyedited.

The following survey asks you to respond to a number of questions about health care. Thank you very much for completing the survey.

---

1. Medication treatment for opioid use disorder is more effective than treatment without medication.

|                       |                       |                            |                       |                       |
|-----------------------|-----------------------|----------------------------|-----------------------|-----------------------|
| Strongly agree        | Somewhat agree        | Neither agree nor disagree | Somewhat disagree     | Strongly disagree     |
| <input type="radio"/> | <input type="radio"/> | <input type="radio"/>      | <input type="radio"/> | <input type="radio"/> |

---

2. People can safely use medication treatment over long periods of time to help them manage their opioid use disorder.

|                       |                       |                            |                       |                       |
|-----------------------|-----------------------|----------------------------|-----------------------|-----------------------|
| Strongly agree        | Somewhat agree        | Neither agree nor disagree | Somewhat disagree     | Strongly disagree     |
| <input type="radio"/> | <input type="radio"/> | <input type="radio"/>      | <input type="radio"/> | <input type="radio"/> |

---

3. Buprenorphine (also called Suboxone® or Subutex®) is an effective treatment for opioid use disorder.

|                       |                       |                            |                       |                       |                       |
|-----------------------|-----------------------|----------------------------|-----------------------|-----------------------|-----------------------|
| Strongly agree        | Somewhat agree        | Neither agree nor disagree | Somewhat disagree     | Strongly disagree     | Don't know            |
| <input type="radio"/> | <input type="radio"/> | <input type="radio"/>      | <input type="radio"/> | <input type="radio"/> | <input type="radio"/> |

---

4. Methadone is an effective treatment for opioid use disorder.

|                       |                       |                            |                       |                       |                       |
|-----------------------|-----------------------|----------------------------|-----------------------|-----------------------|-----------------------|
| Strongly agree        | Somewhat agree        | Neither agree nor disagree | Somewhat disagree     | Strongly disagree     | Don't know            |
| <input type="radio"/> | <input type="radio"/> | <input type="radio"/>      | <input type="radio"/> | <input type="radio"/> | <input type="radio"/> |

---

5. Injectable extended-release naltrexone (also called Vivitrol®) is an effective treatment for opioid use disorder.

|                       |                       |                            |                       |                       |                       |
|-----------------------|-----------------------|----------------------------|-----------------------|-----------------------|-----------------------|
| Strongly agree        | Somewhat agree        | Neither agree nor disagree | Somewhat disagree     | Strongly disagree     | Don't know            |
| <input type="radio"/> | <input type="radio"/> | <input type="radio"/>      | <input type="radio"/> | <input type="radio"/> | <input type="radio"/> |

---

6. How interested are you in treating patients with opioid use disorder in your practice?

|                       |                       |                                     |                       |                       |
|-----------------------|-----------------------|-------------------------------------|-----------------------|-----------------------|
| Very interested       | Somewhat interested   | Neither interested nor uninterested | Somewhat uninterested | Very uninterested     |
| <input type="radio"/> | <input type="radio"/> | <input type="radio"/>               | <input type="radio"/> | <input type="radio"/> |

---

7. Are you waived to prescribe buprenorphine (also called Suboxone or Subutex)?

- Yes, I am waived and I have prescribed buprenorphine to at least one patient with opioid use disorder
- Yes, I am waived but I have not prescribed buprenorphine to a patient with opioid use disorder
- No, I am not waived but I am interested in becoming waived to be able to prescribe buprenorphine in the future
- No, I am not waived and I am not interested in prescribing buprenorphine

---

8. What approaches do you use to treat opioid use disorder in your practice? (select all that apply)

- I provide counseling myself
- I prescribe buprenorphine (also called Suboxone or Subutex)
- I prescribe injectable extended-release naltrexone (also called Vivitrol)
- I refer patients to counseling inside my practice
- I refer patients to counseling outside my practice
- I refer patients to a methadone program
- I refer patients to another clinician who prescribes buprenorphine
